# Supplementary material for: A window into the brain mechanisms associated with noise sensitivity
Source: PubMed Central journal article supplement (PMC5157031; doi:10.1038/srep39236), 2016-12-15
Supplement: srep39236-s1.pdf [file srep39236-s1.pdf]

# A window into the brain mechanisms associated with noise sensitivity

Marina Kliuchko\*, Marja Heinonen-Guzejev, Peter Vuust, Mari Tervaniemi & Elvira Brattico

## Supplementary information

|               | Mean Amplitude | <i>SD</i> | <i>t</i> | <i>dF</i> | <i>P</i> | Mean Latency | <i>SD</i> |
|---------------|----------------|-----------|----------|-----------|----------|--------------|-----------|
| Pitch-MMN     |                |           |          |           |          |              |           |
| Fz            | -1.4           | 1.1       | -12.8    | 65        | 0.000    | 199          | 21        |
| TP9           | 0.5            | 1.0       | 4.9      | 65        | 0.000    |              |           |
| TP10          | 0.7            | 1.0       | 7.6      | 65        | 0.000    |              |           |
| Noise-MMN     |                |           |          |           |          |              |           |
| Fz            | -1.3           | 1.1       | -11.4    | 65        | 0.000    | 140          | 27        |
| TP9           | 0.2            | 0.8       | 2.8      | 65        | 0.007    |              |           |
| TP10          | 0.5            | 0.9       | 5.3      | 65        | 0.000    |              |           |
| Location-MMN  |                |           |          |           |          |              |           |
| Fz            | -2.5           | 1.5       | -17.2    | 65        | 0.000    | 120          | 12        |
| TP9           | 0.7            | 1.0       | 6.8      | 65        | 0.000    |              |           |
| TP10          | 0.9            | 1.1       | 8.5      | 65        | 0.000    |              |           |
| Intensity-MMN |                |           |          |           |          |              |           |
| Fz            | -1.1           | 1.0       | -10.4    | 65        | 0.000    | 157          | 32        |
| TP9           | 0.1            | 0.7       | 1.7      | 65        | 0.091    |              |           |
| TP10          | 0.3            | 0.7       | 4.2      | 65        | 0.000    |              |           |
| Slide-MMN     |                |           |          |           |          |              |           |
| Fz            | -1.7           | 1.2       | -14.2    | 65        | 0.000    | 186          | 22        |
| TP9           | 0.7            | 1.2       | 5.2      | 65        | 0.000    |              |           |
| TP10          | 0.9            | 1.2       | 7.4      | 65        | 0.000    |              |           |
| Rhythm-MMN    |                |           |          |           |          |              |           |
| Fz            | -1.38          | 1.0       | -14.2    | 65        | 0.000    | 153          | 25        |
| TP9           | 0.79           | 0.8       | 9.5      | 65        | 0.000    |              |           |
| TP10          | 0.78           | 0.9       | 8.4      | 65        | 0.000    |              |           |

Supplementary table S1. MMN amplitudes and latencies at Fz and inferior temporal (TP9, TP10) electrodes. Significant *P*-values are shown in bold.

| Deviation | Group     | Mean Amplitude* | SD   | ANCOVA (Main effect of Group) |       |          | Covariate effects             |         |
|-----------|-----------|-----------------|------|-------------------------------|-------|----------|-------------------------------|---------|
|           |           |                 |      | F                             | P     | $\eta^2$ | P (Years of Musical Training) | P (Age) |
| Pitch     | Low NS    | -1.64           | 0.21 | 1.76                          | 0.180 | 0.055    | 0.004                         | 0.262   |
|           | Medium NS | -1.16           | 0.21 |                               |       |          |                               |         |
|           | High NS   | -1.15           | 0.22 |                               |       |          |                               |         |
| Noise     | Low NS    | -1.93           | 0.22 | 6.14                          | 0.004 | 0.168    | 0.418                         | 0.059   |
|           | Medium NS | -0.97           | 0.21 |                               |       |          |                               |         |
|           | High NS   | -1.02           | 0.22 |                               |       |          |                               |         |
| Location  | Low NS    | -3.06           | 0.33 | 3.83                          | 0.027 | 0.111    | 0.199                         | 0.233   |
|           | Medium NS | -1.84           | 0.32 |                               |       |          |                               |         |
|           | High NS   | -2.70           | 0.34 |                               |       |          |                               |         |
| Intensity | Low NS    | -1.41           | 0.20 | 2.56                          | 0.086 | 0.077    | 0.071                         | 0.041   |
|           | Medium NS | -0.84           | 0.19 |                               |       |          |                               |         |
|           | High NS   | -0.89           | 0.21 |                               |       |          |                               |         |
| Slide     | Low NS    | -1.99           | 0.23 | 2.12                          | 0.128 | 0.065    | 0.044                         | 0.272   |
|           | Medium NS | -1.34           | 0.22 |                               |       |          |                               |         |
|           | High NS   | -1.69           | 0.23 |                               |       |          |                               |         |
| Rhythm    | Low NS    | -1.63           | 0.21 | 0.50                          | 0.611 | 0.016    | 0.081                         | 0.095   |
|           | Medium NS | -1.35           | 0.20 |                               |       |          |                               |         |
|           | High NS   | -1.44           | 0.21 |                               |       |          |                               |         |

\*Mean values are adjusted for the effect of Years of Musical Training and Age covariates.

Supplementary Table S2. Results of separate ANCOVAs testing MMN amplitude differences between noise sensitivity (NS) groups.

| Deviation | Group     | Mean Amplitude* | SD   | ANCOVA (Main effect of Group) |       |          | Covariate effects             |         |
|-----------|-----------|-----------------|------|-------------------------------|-------|----------|-------------------------------|---------|
|           |           |                 |      | F                             | P     | $\eta^2$ | P (Years of Musical Training) | P (Age) |
| Pitch     | Low NS    | 10.69           | 1.18 | 3.04                          | 0.055 | 0.084    | 0.012                         | 0.991   |
|           | Medium NS | 8.60            | 1.18 |                               |       |          |                               |         |
|           | High NS   | 6.55            | 1.16 |                               |       |          |                               |         |
| Noise     | Low NS    | 8.92            | 0.74 | 3.82                          | 0.027 | 0.104    | 0.237                         | 0.058   |
|           | Medium NS | 7.46            | 0.74 |                               |       |          |                               |         |
|           | High NS   | 6.00            | 0.73 |                               |       |          |                               |         |
| Location  | Low NS    | 14.71           | 1.48 | 1.65                          | 0.201 | 0.047    | 0.383                         | 0.002   |
|           | Medium NS | 13.16           | 1.48 |                               |       |          |                               |         |
|           | High NS   | 10.89           | 1.45 |                               |       |          |                               |         |
| Intensity | Low NS    | 6.82            | 0.62 | 2.02                          | 0.140 | 0.058    | 0.259                         | 0.048   |
|           | Medium NS | 5.80            | 0.62 |                               |       |          |                               |         |
|           | High NS   | 5.06            | 0.60 |                               |       |          |                               |         |
| Slide     | Low NS    | 13.78           | 1.10 | 2.99                          | 0.057 | 0.083    | 0.000                         | 0.013   |
|           | Medium NS | 13.85           | 1.09 |                               |       |          |                               |         |
|           | High NS   | 10.50           | 1.07 |                               |       |          |                               |         |
| Rhythm    | Low NS    | 9.16            | 1.06 | 0.004                         | 0.996 | >0.0001  | 0.015                         | 0.534   |
|           | Medium NS | 9.21            | 1.06 |                               |       |          |                               |         |
|           | High NS   | 9.09            | 1.04 |                               |       |          |                               |         |

\* Mean values are adjusted for the effect of Years of Musical Training and Age covariates.

Supplementary Table S3. Results of separate ANCOVAs testing MMNm amplitude differences between noise sensitivity (NS) groups.

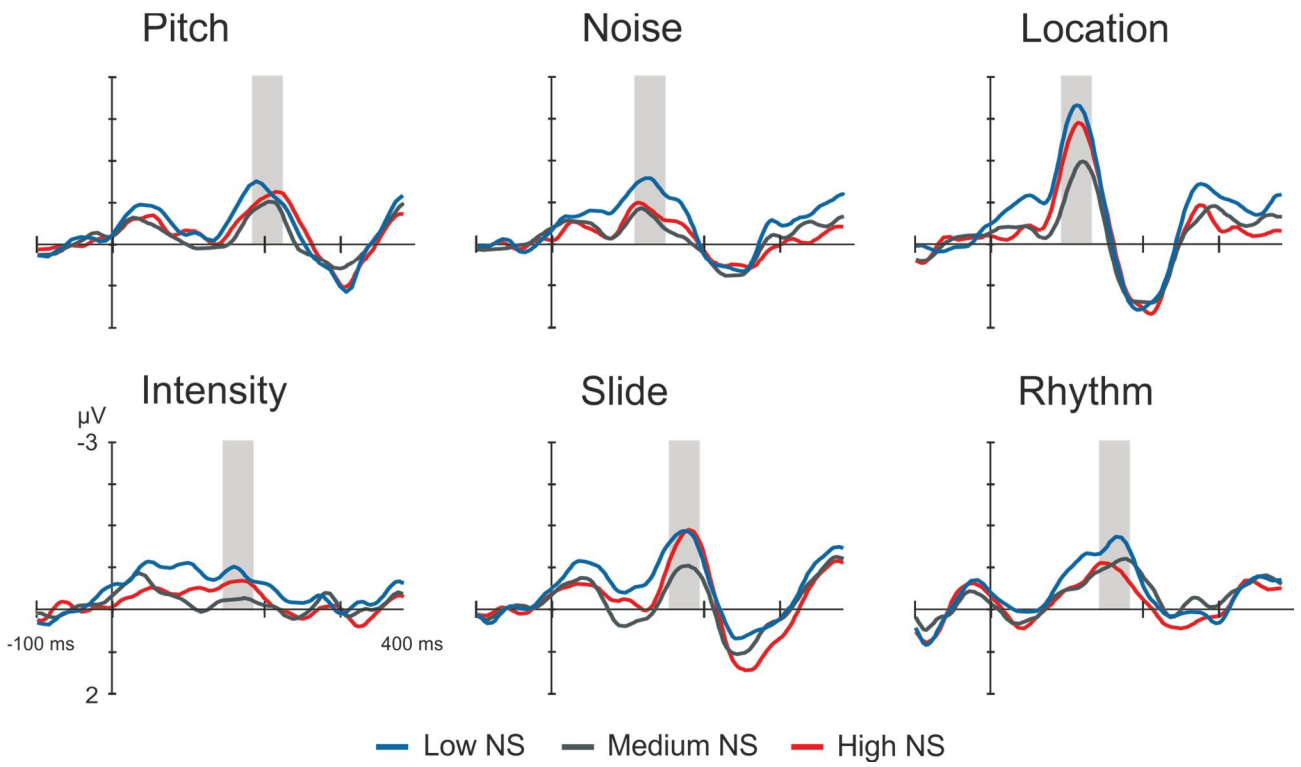

Supplementary Figure S1. Difference waveforms for six types of deviants for MMN responses obtained from Fz electrode.

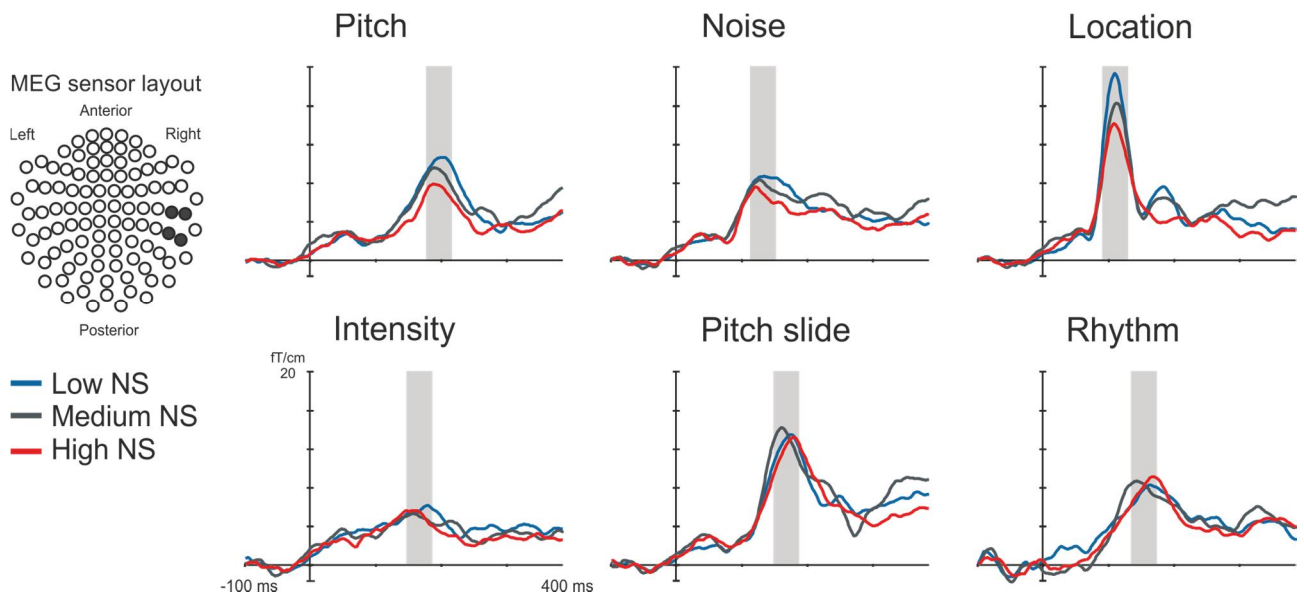

Supplementary Figure S2. Mean difference waveforms for six types of deviants. The illustrated responses were obtained from a group of sensors over the right hemisphere with a largest response.

Supplementary Audio **1** (Caption)

An excerpt of the no-standard musical multifeature mismatch negativity paradigm.

Supplementary Audio **2** (Caption)

A standard sound.

Supplementary Audio **3** (Caption)

A pitch deviant.

Supplementary Audio **4** (Caption)

A noise deviant.

Supplementary Audio **5** (Caption)

A location deviant.

Supplementary Audio **6** (Caption)

An intensity deviant.

Supplementary Audio **7** (Caption)

A pitch slide deviant.

Supplementary Audio **8** (Caption)

A rhythm deviant.
